# Supplementary material for: A CMMI-based approach for medical software project life cycle study
Source: PubMed Central journal article supplement (PMC3699709; doi:10.1186/2193-1801-2-266), 2013-06-17
Supplement: 40064_2013_351_MOESM2_ESM.pdf [file 40064_2013_351_MOESM2_ESM.pdf]

The physician prescribed a stat order to patient for Nuclear Medicine imaging check

The nurse use scheduling system to arrange patient checking date and time

The patient brings his or her checklist and own identifications to do imaging check

The nurse checks patient's personal information, ex: name and medication history to make sure he or she is eligible for checking

Verification

Pass

Fail

The patient takes Radiopharmaceuticals before imaging check

If the medication history of patient has conflicted with imaging study, then he or she need reschedule for reasons of patient safety and imaging check quality

The patient does Nuclear medicine imaging check and physician check results and give comments
