# Supplementary material for: A CMMI-based approach for medical software project life cycle study
Source: PubMed Central journal article supplement (PMC3699709; doi:10.1186/2193-1801-2-266), 2013-06-17

## Domain layer

User requirements  
(Functional,  
Non-Functional, etc.)

CMMI requirements  
(PP, SRS, SRD,  
PPQA, CM, MA, etc.)

## Concept layer

<<Refine>>

<<Refine>>

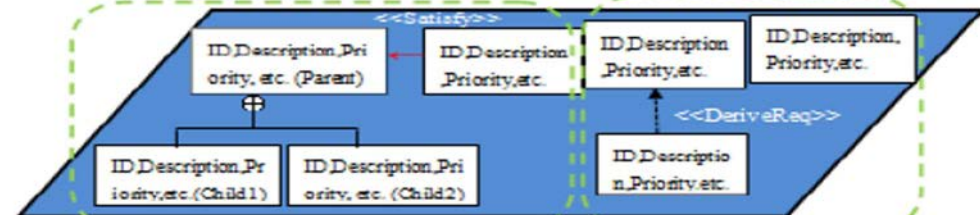

## Instance layer

<<Satisfy>>

<<Satisfy>>

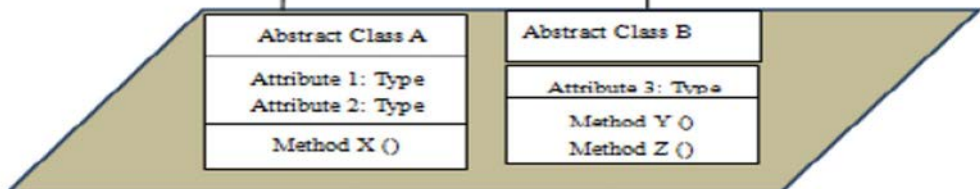

<<Extend>>

<<Extend>>

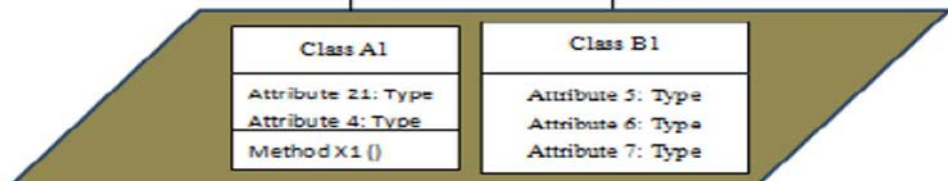

Supplement: 40064_2013_351_MOESM3_ESM.pdf [file 40064_2013_351_MOESM3_ESM.pdf]
