# Supplementary material for: A CMMI-based approach for medical software project life cycle study
Source: PubMed Central journal article supplement (PMC3699709; doi:10.1186/2193-1801-2-266), 2013-06-17
Supplement: 40064_2013_351_MOESM4_ESM.pdf [file 40064_2013_351_MOESM4_ESM.pdf]

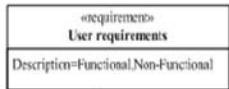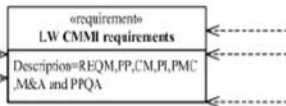

«refine»

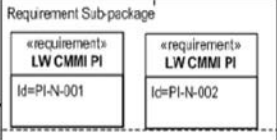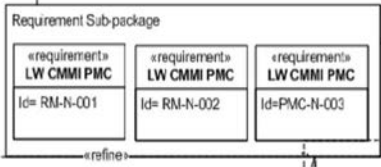

«refine»

«refine»

«refine»

⊥ A
