# Supplementary material for: A CMMI-based approach for medical software project life cycle study
Source: PubMed Central journal article supplement (PMC3699709; doi:10.1186/2193-1801-2-266), 2013-06-17

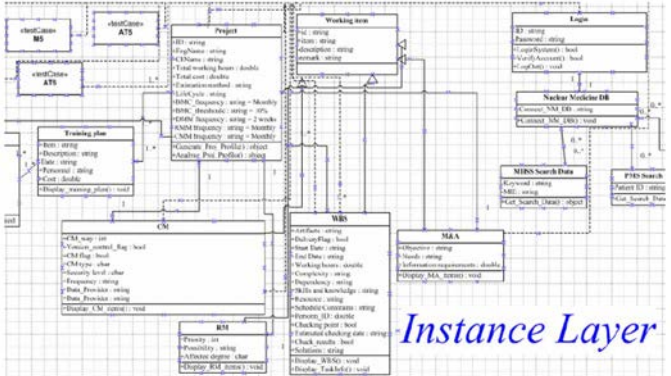

Supplement: 40064_2013_351_MOESM6_ESM.pdf [file 40064_2013_351_MOESM6_ESM.pdf]
