# Supplementary material for: A CMMI-based approach for medical software project life cycle study
Source: PubMed Central journal article supplement (PMC3699709; doi:10.1186/2193-1801-2-266), 2013-06-17
Supplement: 40064_2013_351_MOESM7_ESM.pdf [file 40064_2013_351_MOESM7_ESM.pdf]

|    | A         | B               | C                | D                 | E             |
|----|-----------|-----------------|------------------|-------------------|---------------|
| 1  | <b>Id</b> | <b>Name</b>     | <b>RelatesTo</b> | <b>RelatesHow</b> | <b>Type</b>   |
| 2  | T1        | External common | {T3,T5}          | DeriveReq         | Functionl     |
| 3  | T2        | Acceptance      | T4               | Satisfy           | Non-Functionl |
| 4  | T3        | Safety          | T1               | DeriveReq         | Non-Functionl |
| 5  | T4        | Internal common | T2               | DeriveReq         | Functionl     |
| 6  | T5        | Internal common | T7               | DeriveReq         | Functionl     |
| 7  | T6        | External common | T7               | DeriveReq         | Functionl     |
| 8  | T7        | User-Interface  | {T8,T9}          | DeriveReq         | Non-Functionl |
| 9  | T8        | Test            | {T7,T9}          | Satisfy           | Non-Functionl |
| 10 | T9        | Test Acceptance | {T7,T8}          | Satisfy           | Non-Functionl |

**Fig 7.** The exported information by SysML tools
