# Supplementary material for: A CMMI-based approach for medical software project life cycle study
Source: PubMed Central journal article supplement (PMC3699709; doi:10.1186/2193-1801-2-266), 2013-06-17
Supplement: 40064_2013_351_MOESM8_ESM.pdf [file 40064_2013_351_MOESM8_ESM.pdf]

|   | A          | B          | C          | D          | E          | F          |
|---|------------|------------|------------|------------|------------|------------|
|   | Name       | MHCA-F-001 | MHCA-F-002 | MHCA-F-003 | MHCA-F-004 | MHSS-F-001 |
| 1 | Name       |            |            |            |            |            |
| 2 | PMCS-F-001 |            |            |            |            |            |
| 3 | PMCS-F-002 |            |            |            |            |            |
| 4 | PMCS-F-003 |            |            |            |            |            |
| 5 | PMCS-F-004 |            |            |            | Y          | Y          |
| 6 | PMAS-F-001 |            |            |            |            |            |
| 7 | PMAS-F-002 |            |            |            |            |            |
| 8 | PMAS-F-003 |            |            |            |            |            |
| 9 | PMAS-F-004 |            |            |            | Y          | Y          |

**Fig 8.** Requirements horizontal traceability matrix Table
