# Supplementary material for: A CMMI-based approach for medical software project life cycle study
Source: PubMed Central journal article supplement (PMC3699709; doi:10.1186/2193-1801-2-266), 2013-06-17
Supplement: 40064_2013_351_MOESM9_ESM.pdf [file 40064_2013_351_MOESM9_ESM.pdf]

|    | A           | B  | C  | D  | E  | F  | G   | H   | I   | J   | K   |
|----|-------------|----|----|----|----|----|-----|-----|-----|-----|-----|
|    | Test Case   | M1 | M2 | M3 | M4 | M5 | AT1 | AT2 | AT3 | AT4 | AT5 |
| 1  | Requirement |    |    |    |    |    |     |     |     |     |     |
| 2  | MHSAS-F-001 | Y  |    |    |    |    |     | Y   |     |     |     |
| 3  | MHSAS-F-002 | Y  | Y  | Y  | Y  | Y  | Y   | Y   | Y   | Y   | Y   |
| 4  | MHSAS-F-003 |    |    |    | Y  | Y  |     |     | Y   | Y   | Y   |
| 5  | MHSAS-F-004 |    |    |    | Y  | Y  |     |     |     |     | Y   |
| 6  | MHSAS-F-005 |    |    |    | Y  | Y  | Y   |     |     |     | Y   |
| 7  | MHCA-F-001  | Y  |    |    |    |    |     | Y   |     |     |     |
| 8  | MHCA-F-002  | Y  |    |    |    |    |     | Y   |     |     |     |
| 9  | MHCA-F-003  | Y  |    |    |    |    |     | Y   |     |     |     |
| 10 | MHCA-F-004  | Y  | Y  | Y  | Y  | Y  | Y   | Y   | Y   | Y   | Y   |
| 11 | MHSS-F-001  | Y  | Y  | Y  | Y  | Y  | Y   | Y   | Y   | Y   | Y   |

**Fig 9.** Test cases vs. Requirements traceability matrix Table
