# Supplementary material for: A CMMI-based approach for medical software project life cycle study
Source: Springerplus. 2013 Jun 17;2(1):266. doi: 10.1186/2193-1801-2-266 (PMC3699709; doi:10.1186/2193-1801-2-266)
Supplement: Supplementary file 1 — Authors’ original file for figure 1 [file 40064_2013_351_MOESM1_ESM.pdf]

Milestone 1

Milestone 2

Milestone 3

Project  
Planning

Project Monitor and  
Control

Technology  
Advancement

Requirement Management

Requirement  
Development

NSC's  
Requirements

Technical  
Solution

Product  
Integration

Delivery  
Product  
Papers  
...

Concept  
Exploration

Technology Innovation

Verification and Validation

Support (CM, PPQA, M&A)
